# Supplementary material for: A Notch-dependent transcriptional mechanism controls expression of temporal patterning factors in Drosophila medulla
Source: eLife. 2022 Aug 30;11:e75879. doi: 10.7554/eLife.75879 (PMC9427115; doi:10.7554/eLife.75879)
Supplement: Figure 2—figure supplement 2—source data 1. [file elife-75879-fig2-figsupp2-data1.xlsx]

## Sheet: Sheet1
ANOVA results
Table Analyzed	Dpn expression
Data sets analyzed	A-C
ANOVA summary
F	0.6625
P value	0.5277
P value summary	ns
Significant diff. among means (P < 0.05)?	No
R squared	0.06856
Brown-Forsythe test
F (DFn, DFd)	1.992 (2, 18)
P value	0.1654
P value summary	ns
Are SDs significantly different (P < 0.05)?	No
Bartlett's test
Bartlett's statistic (corrected)	8.049
P value	0.0179
P value summary	*
Are SDs significantly different (P < 0.05)?	Yes
ANOVA table	SS	DF	MS	F (DFn, DFd)	P value
Treatment (between columns)	0.0008098	2	0.0004049	F (2, 18) = 0.6625	P=0.5277
Residual (within columns)	0.011	18	0.0006112
Total	0.01181	20
Data summary
Number of treatments (columns)	3
Number of values (total)	21

## Sheet: Sheet2
Multiple comparisons (Dpn expression)
Number of families	1
Number of comparisons per family	2
Alpha	0.05
Dunnett's multiple comparisons test	Mean Diff.	95.00% CI of diff.	Below threshold?	Summary	Adjusted P Value	A-?
wild type vs. u8772 220bp deletion	0.01085	-0.02085 to 0.04255	No	ns	0.631	B	u8772 220bp deletion
wild type vs. d5778 850bp deletion	-0.003806	-0.03550 to 0.02789	No	ns	0.9414	C	d5778 850bp deletion
Test details	Mean 1	Mean 2	Mean Diff.	SE of diff.	n1	n2	q	DF
wild type vs. u8772 220bp deletion	0.2262	0.2154	0.01085	0.01321	7	7	0.8212	18
wild type vs. d5778 850bp deletion	0.2262	0.23	-0.003806	0.01321	7	7	0.288	18
