# Supplementary material for: A Notch-dependent transcriptional mechanism controls expression of temporal patterning factors in Drosophila medulla
Source: eLife. 2022 Aug 30;11:e75879. doi: 10.7554/eLife.75879 (PMC9427115; doi:10.7554/eLife.75879)
Supplement: Figure 2—figure supplement 2—source data 2. [file elife-75879-fig2-figsupp2-data2.xlsx]

## Sheet: Sheet1
Ordinary one-way ANOVA results for Slp1 expression
Table Analyzed	Slp1 expression
Data sets analyzed	A-C
ANOVA summary
F	20.91
P value	<0.0001
P value summary	****
Significant diff. among means (P < 0.05)?	Yes
R squared	0.6991
Brown-Forsythe test
F (DFn, DFd)	3.166 (2, 18)
P value	0.0664
P value summary	ns
Are SDs significantly different (P < 0.05)?	No
Bartlett's test
Bartlett's statistic (corrected)	8.29
P value	0.0158
P value summary	*
Are SDs significantly different (P < 0.05)?	Yes
ANOVA table	SS	DF	MS	F (DFn, DFd)	P value
Treatment (between columns)	0.006251	2	0.003125	F (2, 18) = 20.91	P<0.0001
Residual (within columns)	0.00269	18	0.0001494
Total	0.008941	20
Data summary
Number of treatments (columns)	3
Number of values (total)	21

## Sheet: Sheet2
Multiple comparisons Slp1 expression
Number of families	1
Number of comparisons per family	2
Alpha	0.05
Dunnett's multiple comparisons test	Mean Diff.	95.00% CI of diff.	Below threshold?	Summary	Adjusted P Value	A-?
wild type vs. u8772 220bp deletion	0.02338	0.007710 to 0.03906	Yes	**	0.0041	B	u8772 220bp deletion
wild type vs. d5778 850bp deletion	-0.01879	-0.03447 to -0.003119	Yes	*	0.0187	C	d5778 850bp deletion
Test details	Mean 1	Mean 2	Mean Diff.	SE of diff.	n1	n2	q	DF
wild type vs. u8772 220bp deletion	0.1041	0.08076	0.02338	0.006534	7	7	3.579	18
wild type vs. d5778 850bp deletion	0.1041	0.1229	-0.01879	0.006534	7	7	2.876	18
