# Supplementary material for: A Notch-dependent transcriptional mechanism controls expression of temporal patterning factors in Drosophila medulla
Source: eLife. 2022 Aug 30;11:e75879. doi: 10.7554/eLife.75879 (PMC9427115; doi:10.7554/eLife.75879)
Supplement: Figure 2—figure supplement 2—source data 3. [file elife-75879-fig2-figsupp2-data3.xlsx]

## Sheet: Sheet1
Ordinary one way ANOVA results
Table Analyzed	Slp2 expression
Data sets analyzed	A-C
ANOVA summary
F	9.098
P value	0.0019
P value summary	**
Significant diff. among means (P < 0.05)?	Yes
R squared	0.5027
Brown-Forsythe test
F (DFn, DFd)	0.4339 (2, 18)
P value	0.6546
P value summary	ns
Are SDs significantly different (P < 0.05)?	No
Bartlett's test
Bartlett's statistic (corrected)	1.032
P value	0.5969
P value summary	ns
Are SDs significantly different (P < 0.05)?	No
ANOVA table	SS	DF	MS	F (DFn, DFd)	P value
Treatment (between columns)	0.01155	2	0.005777	F (2, 18) = 9.098	P=0.0019
Residual (within columns)	0.01143	18	0.000635
Total	0.02298	20
Data summary
Number of treatments (columns)	3
Number of values (total)	21

## Sheet: Sheet2
Multiple comparisons (Slp2 expression)
Number of families	1
Number of comparisons per family	2
Alpha	0.05
Dunnett's multiple comparisons test	Mean Diff.	95.00% CI of diff.	Below threshold?	Summary	Adjusted P Value	A-?
wild type vs. u8772 220bp deletion	0.02971	-0.002600 to 0.06202	No	ns	0.073	B	u8772 220bp deletion
wild type vs. d5778 850bp deletion	-0.02774	-0.06004 to 0.004573	No	ns	0.0965	C	d5778 850bp deletion
Test details	Mean 1	Mean 2	Mean Diff.	SE of diff.	n1	n2	q	DF
wild type vs. u8772 220bp deletion	0.1228	0.09304	0.02971	0.01347	7	7	2.206	18
wild type vs. d5778 850bp deletion	0.1228	0.1505	-0.02774	0.01347	7	7	2.059	18
