# Supplementary material for: A Notch-dependent transcriptional mechanism controls expression of temporal patterning factors in Drosophila medulla
Source: eLife. 2022 Aug 30;11:e75879. doi: 10.7554/eLife.75879 (PMC9427115; doi:10.7554/eLife.75879)
Supplement: Figure 2—figure supplement 2—source data 4. [file elife-75879-fig2-figsupp2-data4.xlsx]

## Sheet: Sheet1
Dpn expression					Slp1 expression					Slp2
	wild type	u8772 220bp deletion	d5778 850bp deletion			wild type	u8772 220bp deletion	d5778 850bp deletion			wild type	u8772 220bp deletion	d5778 850bp deletion
Set 1	0.18875	0.21133	0.2247		Set 1	0.10733	0.088292	0.092805		Set 1	0.10941	0.13688	0.11964
Set 2	0.19382	0.19678	0.24915		Set 2	0.09156	0.076729	0.14448		Set 2	0.11127	0.087762	0.20841
Set 3	0.20969	0.21276	0.24417		Set 3	0.10552	0.080118	0.14588		Set 3	0.10918	0.098011	0.15055
Set 4	0.26339	0.21175	0.21889		Set 4	0.096705	0.073585	0.12264		Set 4	0.14924	0.083327	0.14424
Set 5	0.21806	0.24642	0.21648		Set 5	0.11419	0.076182	0.1118		Set 5	0.10887	0.071806	0.12918
Set 6	0.29222	0.22243	0.23058		Set 6	0.11307	0.086209	0.11613		Set 6	0.15899	0.076215	0.17303
Set 7	0.21765	0.20615	0.22625		Set 7	0.10062	0.084193	0.12681		Set 7	0.11229	0.097284	0.12835
