# Supplementary material for: A Notch-dependent transcriptional mechanism controls expression of temporal patterning factors in Drosophila medulla
Source: eLife. 2022 Aug 30;11:e75879. doi: 10.7554/eLife.75879 (PMC9427115; doi:10.7554/eLife.75879)
Supplement: Figure 7—source data 1. [file elife-75879-fig7-data1.xlsx]

## Sheet: Sheet1
	Wild type	220-Ey-1d	220-Ey-2m	220-SuH-1-4m	220-SuH-1m4m	220-Scro-1m	220-Slp1-1m2m
Set 1	2.09233	0.0377043	0.0381222	0.0877136	0.250836	0.140695	0.833782
Set 2	1.26004	0.0620459	0.0183937	0.0178857	0.419006	0.28534	0.195619
Set 3	1.72685	0.0122941	0.0256046	0.0384375	0.704916	0.0565114	0.113659

## Sheet: Sheet2
Ordinary one way ANOVA
Table Analyzed	Data 1
Data sets analyzed	A-G
ANOVA summary
F	18.73
P value	<0.0001
P value summary	****
Significant diff. among means (P < 0.05)?	Yes
R squared	0.8892
Brown-Forsythe test
F (DFn, DFd)	1.259 (6, 14)
P value	0.3363
P value summary	ns
Are SDs significantly different (P < 0.05)?	No
Bartlett's test
Bartlett's statistic (corrected)
P value
P value summary
Are SDs significantly different (P < 0.05)?
ANOVA table	SS	DF	MS	F (DFn, DFd)	P value
Treatment (between columns)	6.382	6	1.064	F (6, 14) = 18.73	P<0.0001
Residual (within columns)	0.7951	14	0.05679
Total	7.177	20
Data summary
Number of treatments (columns)	7
Number of values (total)	21

## Sheet: Sheet3
Multiple comparisons
Number of families	1
Number of comparisons per family	6
Alpha	0.05
Dunnett's multiple comparisons test	Mean Diff.	95.00% CI of diff.	Below threshold?	Summary	Adjusted P Value	A-?
Wild type vs. 220-Ey-1d	1.656	1.089 to 2.222	Yes	****	<0.0001	B	220-Ey-1d
Wild type vs. 220-Ey-2m	1.666	1.099 to 2.232	Yes	****	<0.0001	C	220-Ey-2m
Wild type vs. 220-SuH-1-4m	1.645	1.078 to 2.212	Yes	****	<0.0001	D	220-SuH-1-4m
Wild type vs. 220-SuH-1m4m	1.235	0.6681 to 1.802	Yes	***	0.0001	E	220-SuH-1m4m
Wild type vs. 220-Scro-1m	1.532	0.9655 to 2.099	Yes	****	<0.0001	F	220-Scro-1m
Wild type vs. 220-Slp1-1m2m	1.312	0.7453 to 1.879	Yes	****	<0.0001	G	220-Slp1-1m2m
Test details	Mean 1	Mean 2	Mean Diff.	SE of diff.	n1	n2	q	DF
Wild type vs. 220-Ey-1d	1.693	0.03735	1.656	0.1946	3	3	8.509	14
Wild type vs. 220-Ey-2m	1.693	0.02737	1.666	0.1946	3	3	8.56	14
Wild type vs. 220-SuH-1-4m	1.693	0.04801	1.645	0.1946	3	3	8.454	14
Wild type vs. 220-SuH-1m4m	1.693	0.4583	1.235	0.1946	3	3	6.346	14
Wild type vs. 220-Scro-1m	1.693	0.1608	1.532	0.1946	3	3	7.874	14
Wild type vs. 220-Slp1-1m2m	1.693	0.381	1.312	0.1946	3	3	6.743	14
