# Supplementary material for: A Notch-dependent transcriptional mechanism controls expression of temporal patterning factors in Drosophila medulla
Source: eLife. 2022 Aug 30;11:e75879. doi: 10.7554/eLife.75879 (PMC9427115; doi:10.7554/eLife.75879)
Supplement: Figure 8—source data 1. [file elife-75879-fig8-data1.xlsx]

## Sheet: Sheet1
	Wild type	850-Ey-1m2d3d	850-Scro1-7d
Set 1	1.85595	0.0748392	0.243478
Set 2	2.39143	0.240327	0.505907
Set 3	2.39268	0.308289	0.658472
Set 4	1.35516	0.0277941	0.58654
Set 5	1.46405	0.212186	0.375431

## Sheet: Sheet2
ANOVA results
Table Analyzed	Data 1
Data sets analyzed	A-C
ANOVA summary
F	44.42
P value	<0.0001
P value summary	****
Significant diff. among means (P < 0.05)?	Yes
R squared	0.881
Brown-Forsythe test
F (DFn, DFd)	6.181 (2, 12)
P value	0.0143
P value summary	*
Are SDs significantly different (P < 0.05)?	Yes
Bartlett's test
Bartlett's statistic (corrected)	7.998
P value	0.0183
P value summary	*
Are SDs significantly different (P < 0.05)?	Yes
ANOVA table	SS	DF	MS	F (DFn, DFd)	P value
Treatment (between columns)	8.428	2	4.214	F (2, 12) = 44.42	P<0.0001
Residual (within columns)	1.138	12	0.09487
Total	9.566	14
Data summary
Number of treatments (columns)	3
Number of values (total)	15

## Sheet: Sheet3
Multiple comparisons (Ordinary one way ANOVA)
Number of families	1
Number of comparisons per family	2
Alpha	0.05
Dunnett's multiple comparisons test	Mean Diff.	95.00% CI of diff.	Below threshold?	Summary	Adjusted P Value	A-?
Wild type vs. 850-Ey-1m2d3d	1.719	1.232 to 2.207	Yes	****	<0.0001	B	850-Ey-1m2d3d
Wild type vs. 850-Scro1-7d	1.418	0.9304 to 1.905	Yes	****	<0.0001	C	850-Scro1-7d
Test details	Mean 1	Mean 2	Mean Diff.	SE of diff.	n1	n2	q	DF
Wild type vs. 850-Ey-1m2d3d	1.892	0.1727	1.719	0.1948	5	5	8.825	12
Wild type vs. 850-Scro1-7d	1.892	0.474	1.418	0.1948	5	5	7.279	12
