# Supplementary material for: A Notch-dependent transcriptional mechanism controls expression of temporal patterning factors in Drosophila medulla
Source: eLife. 2022 Aug 30;11:e75879. doi: 10.7554/eLife.75879 (PMC9427115; doi:10.7554/eLife.75879)
Supplement: Figure 9—source data 1. [file elife-75879-fig9-data1.xlsx]

## Sheet: Sheet1
Wild type	850-SuH-1m2m3m6m	850-SuH-1-6m
0.994126	1.72539	2.21643
0.927942	1.78426	2.31318
1.1422	2.17927	1.99478

## Sheet: Sheet2
Table Analyzed	Data 1
Data sets analyzed	A-C
ANOVA summary
F	32.73
P value	0.0006
P value summary	***
Significant diff. among means (P < 0.05)?	Yes
R squared	0.916
Brown-Forsythe test
F (DFn, DFd)	0.2282 (2, 6)
P value	0.8026
P value summary	ns
Are SDs significantly different (P < 0.05)?	No
Bartlett's test
Bartlett's statistic (corrected)
P value
P value summary
Are SDs significantly different (P < 0.05)?
ANOVA table	SS	DF	MS	F (DFn, DFd)	P value
Treatment (between columns)	2.173	2	1.087	F (2, 6) = 32.73	P=0.0006
Residual (within columns)	0.1992	6	0.0332
Total	2.372	8
Data summary
Number of treatments (columns)	3
Number of values (total)	9

## Sheet: Sheet3
Number of families	1
Number of comparisons per family	2
Alpha	0.05
Dunnett's multiple comparisons test	Mean Diff.	95.00% CI of diff.	Below threshold?	Summary	Adjusted P Value	A-?
Wild type vs. 850-SuH-1m2m3m6m	-0.8749	-1.301 to -0.4489	Yes	**	0.0019	B	850-SuH-1m2m3m6m
Wild type vs. 850-SuH-1-6m	-1.153	-1.579 to -0.7274	Yes	***	0.0005	C	850-SuH-1-6m
Test details	Mean 1	Mean 2	Mean Diff.	SE of diff.	n1	n2	q	DF
Wild type vs. 850-SuH-1m2m3m6m	1.021	1.896	-0.8749	0.1488	3	3	5.881	6
Wild type vs. 850-SuH-1-6m	1.021	2.175	-1.153	0.1488	3	3	7.753	6
